# Supplementary material for: Демократические начала в уголовно-правовых отношениях, связанных с незаконным оборотом оружия
Source: MDPI journal article supplement (doi:10.3390/ijerph182111094), 2014-01-01
Supplement: s1 [file s1]

Supplementary Table S1. Univariate association of clinical variables with diabetic complications

|                                                       | DPN                 |          | CAN              |          | DR                    |          | DN              |          |
|-------------------------------------------------------|---------------------|----------|------------------|----------|-----------------------|----------|-----------------|----------|
|                                                       | OR (95%CI)          | p-value  | OR (95%CI)       | p-value  | OR (95%CI)            | p-value  | OR (95%CI)      | p-value  |
| Age                                                   | 1.1 (1.1-1.1)       | 2.49E-49 | 1.1 (1-1.1)      | 6.73E-15 | 1.1 (1.1-1.1)         | 5.05E-50 | 1 (1-1.1)       | 2.81E-16 |
| Age at T1D diagnosis                                  | 1 (1-1.1)           | 9.81E-22 | 1 (1-1)          | 1.46E-03 | 1 (1-1)               | 3.85E-03 | 1 (1-1)         | 3.09E-02 |
| Duration of T1D                                       | 1.1 (1.1-1.1)       | 1.28E-45 | 1.1 (1.1-1.1)    | 2.21E-16 | 1.1 (1.1-1.1)         | 2.26E-65 | 1.1 (1.1-1.1)   | 7.77E-21 |
| Sex                                                   | 0.7 (0.5-0.9)       | 1.46E-02 | 1.1 (0.7-1.9)    | 6.46E-01 | 0.7 (0.5-0.9)         | 3.77E-03 | 0.9 (0.6-1.3)   | 4.83E-01 |
| <b>Complications</b>                                  |                     |          |                  |          |                       |          |                 |          |
| DPN                                                   |                     |          | 25.4 (14.2-45.5) | 1.55E-27 | 12.2 (8.8-17)         | 4.77E-49 | 7.9 (5-12.4)    | 2.79E-19 |
| AN                                                    | 25.4 (14.2-45.5)    | 1.55E-27 |                  |          | 9.3 (5.5-15.7)        | 8.97E-17 | 6 (3.2-11.4)    | 4.26E-08 |
| DR                                                    | 12.2 (8.8-17)       | 4.77E-49 | 9.3 (5.5-15.7)   | 8.94E-17 |                       |          | 13.7 (8.6-21.7) | 2.15E-28 |
| DN                                                    | 7.9 (5-12.4)        | 2.79E-19 | 6 (3.2-11.4)     | 4.26E-08 | 13.7 (8.6-21.7)       | 2.16E-28 |                 |          |
| Blindness                                             | 6.6 (3.5-12.4)      | 3.39E-09 | 5.6 (2.4-13.1)   | 8.08E-05 | 286 (39.1-2090.5)     | 2.51E-08 | 19.1 (9.9-36.9) | 1.92E-18 |
| Photocoagulation                                      | 10.5 (7.4-15.1)     | 6.57E-38 | 8.1 (4.7-13.7)   | 1.43E-14 | 1492.5 (363.3-6131.9) | 3.79E-24 | 14.5 (9.2-23)   | 3.80E-30 |
| Amputation                                            | 36.2 (10.3-127.2)   | 2.14E-08 | 11.4 (3.9-33.5)  | 9.26E-06 | 19.6 (6.3-60.6)       | 2.41E-07 | 6.1 (1.9-19.3)  | 2.10E-03 |
| Diabetic Foot Ulcer                                   | 198.3 (26.7-1474.5) | 2.36E-07 | 16.8 (7.1-39.9)  | 1.36E-10 | 32.8 (11.1-96.4)      | 2.28E-10 | 14.1 (6.1-32.7) | 7.91E-10 |
| <b>Past Medical History</b>                           |                     |          |                  |          |                       |          |                 |          |
| Smoking                                               | 1.5 (0.9-2.7)       | 1.44E-01 | 1 (0.4-2.3)      | 9.18E-01 | 1.5 (0.9-2.7)         | 1.21E-01 | 1.4 (0.6-3)     | 3.96E-01 |
| Hypertension                                          | 6.8 (5-9.4)         | 3.40E-32 | 4.9 (2.9-8.2)    | 1.55E-09 | 7.9 (5.8-10.6)        | 1.99E-41 | 8.1 (5.2-12.7)  | 4.63E-20 |
| Dyslipidemia                                          | 5 (3.7-6.8)         | 1.86E-24 | 4.6 (2.8-7.7)    | 4.60E-09 | 3.7 (2.8-5)           | 3.24E-19 | 3.3 (2.1-5.1)   | 8.02E-08 |
| CAD                                                   | 13.3 (8.7-20.5)     | 4.61E-32 | 6.1 (3.3-11.2)   | 6.33E-09 | 6 (3.9-9.1)           | 5.29E-17 | 5.8 (3.4-9.9)   | 2.05E-10 |
| Prior Angioplasty Stent                               | 18.5 (10.6-32.4)    | 1.52E-24 | 6.1 (2.9-12.7)   | 1.45E-06 | 8.9 (5.3-15.1)        | 4.66E-16 | 7.4 (4-13.8)    | 1.99E-10 |
| Prior CABG                                            | 12 (6.4-22.3)       | 4.63E-15 | 5.4 (2.3-12.6)   | 1.09E-04 | 5.6 (3.1-10.3)        | 2.64E-08 | 4.2 (1.9-9.3)   | 4.24E-04 |
| Prior CVA                                             | 9.4 (2.5-35.2)      | 9.20E-04 | 13.5 (3.3-55.2)  | 3.03E-04 | 11.8 (2.9-47.7)       | 5.06E-04 | 15 (4-57)       | 6.78E-05 |
| Prior MI                                              | 12.7 (6.1-26.5)     | 1.66E-11 | 4 (1.4-11.9)     | 1.19E-02 | 7.5 (3.6-15.3)        | 4.75E-08 | 5.5 (2.3-13.1)  | 1.29E-04 |
| Prior TIA                                             | 19.5 (6.1-62.9)     | 6.35E-07 | 4.5 (1-20.4)     | 5.38E-02 | 4.5 (1.5-13)          | 5.95E-03 | 14.4 (4.9-42.4) | 1.38E-06 |
| <b>Physiologic Measurements and Laboratory Values</b> |                     |          |                  |          |                       |          |                 |          |
| SBP                                                   | 1.1 (1-1.1)         | 5.97E-15 | 1 (1-1.1)        | 1.18E-04 | 1.1 (1-1.1)           | 3.07E-19 | 1.1 (1-1.1)     | 2.02E-10 |
| DBP                                                   | 1 (1-1.1)           | 2.07E-03 | 1.1 (1-1.1)      | 5.20E-04 | 1 (1-1.1)             | 1.66E-04 | 1.1 (1-1.1)     | 6.89E-04 |
| Hemoglobin                                            | 0.8 (0.7-0.8)       | 3.46E-06 | 0.8 (0.7-1)      | 6.00E-02 | 0.7 (0.6-0.8)         | 6.06E-08 | 0.7 (0.6-0.8)   | 5.39E-05 |
| Albumin                                               | 1 (1-1)             | 3.19E-01 | 0.7 (0.4-1.5)    | 3.75E-01 | 0.3 (0.2-0.5)         | 3.73E-07 | 0.4 (0.2-0.7)   | 1.15E-03 |
| BUN                                                   | 1.1 (1.1-1.1)       | 8.08E-12 | 1 (1-1.1)        | 8.66E-03 | 1.1 (1.1-1.2)         | 1.18E-19 | 1.1 (1.1-1.2)   | 3.06E-17 |
| Creatinine                                            | 1 (1-1.1)           | 6.72E-01 | 1 (0.9-1.1)      | 9.06E-01 | 1 (1-1.1)             | 4.48E-01 | 1.1 (1-1.1)     | 1.99E-02 |
| Micro-Albumin                                         | 1 (1-1)             | 8.42E-03 | 1 (1-1)          | 8.42E-01 | 1 (1-1)               | 9.42E-05 | 1 (1-1)         | 9.71E-06 |
| ACR                                                   | 1 (1-1)             | 2.21E-02 | 1 (1-1)          | 8.00E-01 | 1 (1-1)               | 1.54E-06 | 1 (1-1)         | 3.00E-10 |
| Lipid Panel                                           |                     |          |                  |          |                       |          |                 |          |
| LDL                                                   | 1 (1-1)             | 7.01E-01 | 1 (1-1)          | 5.71E-01 | 1 (1-1)               | 3.28E-01 | 1 (1-1)         | 7.90E-01 |
| Total_Cholesterol                                     | 1 (1-1)             | 1.15E-01 | 1 (1-1)          | 5.35E-01 | 1 (1-1)               | 2.92E-02 | 1 (1-1)         | 1.18E-01 |
| Triglycerides                                         | 1 (1-1)             | 4.37E-01 | 1 (1-1)          | 2.56E-01 | 1 (1-1)               | 7.89E-01 | 1 (1-1)         | 9.33E-02 |
| HDL                                                   | 1 (1-1)             | 1.80E-02 | 1 (1-1)          | 2.69E-03 | 1 (1-1)               | 1.62E-02 | 1 (1-1)         | 7.55E-01 |
| HbA1c_3.1                                             | 1 (0.9-1.1)         | 8.33E-01 | 1 (0.9-1.2)      | 7.52E-01 | 0.9 (0.8-1)           | 1.89E-01 | 1.1 (0.9-1.2)   | 4.21E-01 |
| HbA1c, SD                                             | 0.9 (0.7-1.1)       | 3.38E-01 | 0.8 (0.5-1.3)    | 3.54E-01 | 0.8 (0.6-1)           | 4.46E-02 | 1 (0.8-1.3)     | 8.28E-01 |
| HbA1c, last visit                                     | 1 (0.9-1.1)         | 7.55E-01 | 1 (0.8-1.2)      | 9.71E-01 | 0.9 (0.8-1)           | 1.26E-01 | 1.1 (0.9-1.2)   | 3.59E-01 |
| HbA1c, maximum                                        | 1 (0.9-1.1)         | 9.57E-01 | 1 (0.8-1.1)      | 8.58E-01 | 0.9 (0.9-1)           | 8.40E-02 | 1.1 (1-1.2)     | 1.96E-01 |

DPN: Diabetic Peripheral Neuropathy, AN: Autonomic Neuropathy, DR: Diabetic Retinopathy, DN: Diabetic Nephropathy, SD: Standard Deviation, ACR: Albumin-Creatinine Ratio, CAD: Coronary Artery Disease, CABG: Coronary Artery Bypass Graft, CVA: Cerebro-vascular accident, MI: Myocardial Infarction, TIA: Transient Ischemic Attack, DBP: Diastolic Blood pressure, SBP: Systolic Blood Pressure.

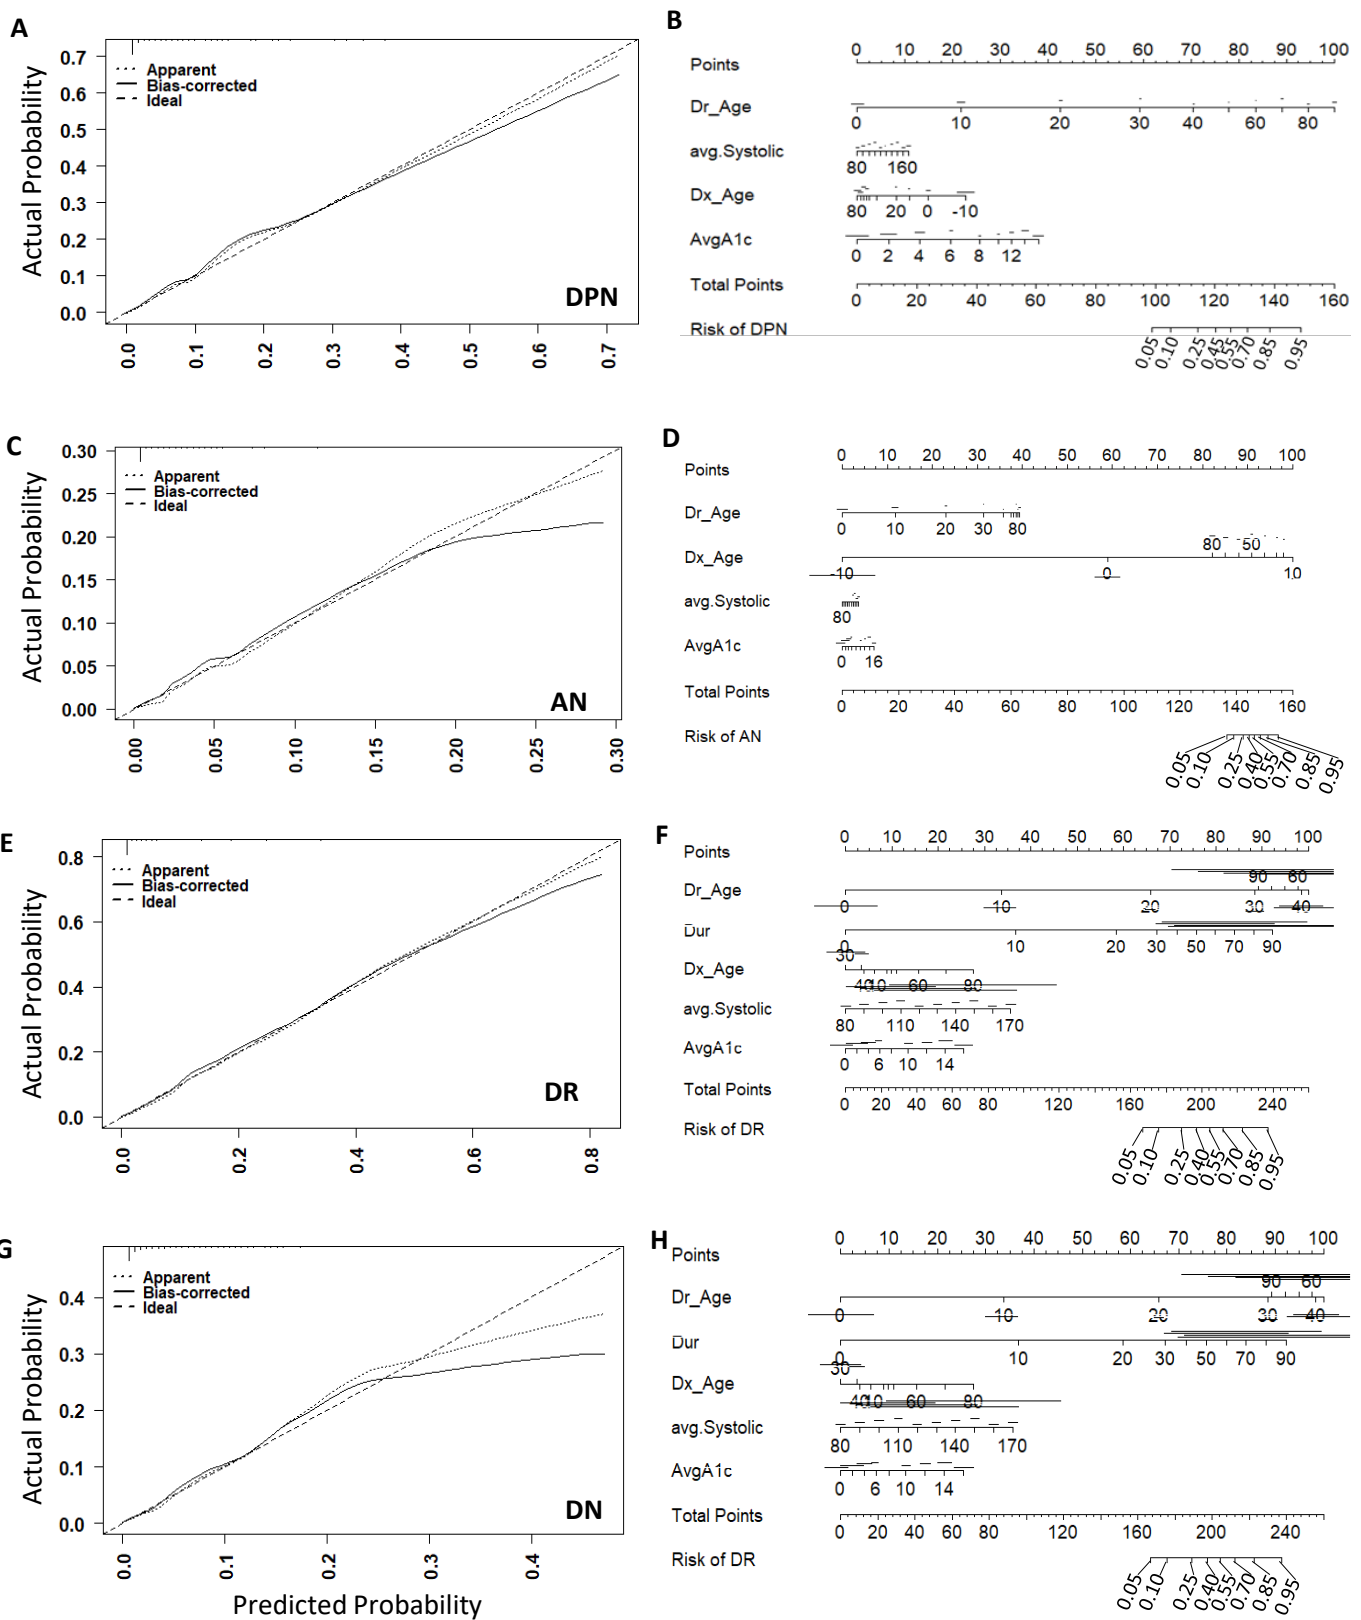

**Supplementary Figure 1-X.S** : Calibration plots and nomograms for DPN (A & B, AN (C & D), DR (E & F), and DN (G & H) are presented in supplementary figure 1. We applied the four microvascular complication models to the PAGODA dataset with 500 iterations of bootstrapping to generate the calibration plot showing the actual probability of complication in the y-axis and the predicted probability of complication based on the models in the x-axis. A bias correction was applied by calculating the difference in probability between the bootstrap iterations and the model prediction with the full dataset. The nomogram was generated again based on the beta coefficients from the four logistic microvascular complication models.
